# Supplementary material for: Dynamic stability of Sgt2 enables selective and privileged client handover in a chaperone triad
Source: PubMed Central journal article supplement (PMC10761869; doi:10.1038/s41467-023-44260-5), 2024-01-02
Supplement: 41467_2023_44260_MOESM3_ESM.pdf [file 41467_2023_44260_MOESM3_ESM.pdf]

File Name: Supplementary Dataset 1

Description: mpH2MM analysis of all  $\mu$ s-ALEX data
