# Supplementary material for: Dynamic stability of Sgt2 enables selective and privileged client handover in a chaperone triad
Source: PubMed Central journal article supplement (PMC10761869; doi:10.1038/s41467-023-44260-5), 2024-01-02
Supplement: 41467_2023_44260_MOESM4_ESM.pdf [file 41467_2023_44260_MOESM4_ESM.pdf]

# Apo-Sgt2

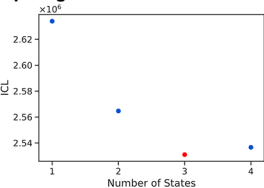

$$\begin{aligned}k_{1 \rightarrow 2} &= 57.65 \pm 7.89 \text{ /sec} \\k_{1 \rightarrow 3} &= 1534.26 \pm 133.07 \text{ /sec} \\k_{2 \rightarrow 1} &= 260.93 \pm 43.48 \text{ /sec} \\k_{2 \rightarrow 3} &= 391.64 \pm 50.37 \text{ /sec} \\k_{3 \rightarrow 1} &= 1475.38 \pm 183.54 \text{ /sec} \\k_{3 \rightarrow 2} &= 107.96 \pm 16.82 \text{ /sec}\end{aligned}$$

## 3-state model (Selected, ICL minimized)

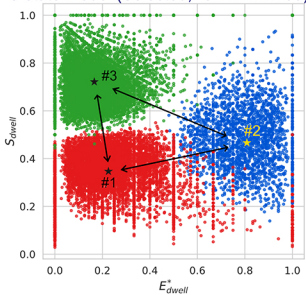

# Sgt2-Bos1 (Purified complex)

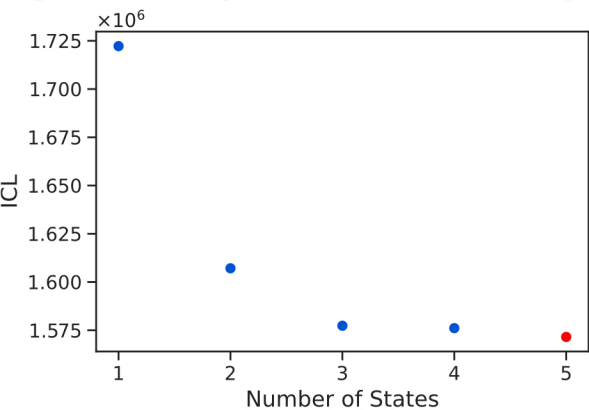

$$\begin{aligned}
 k_{1 \rightarrow 2} &= 261.24 \pm 24.91 \text{ /sec} \\
 k_{1 \rightarrow 3} &= 1800.47 \pm 177.88 \text{ /sec} \\
 k_{2 \rightarrow 1} &= 437.37 \pm 64.06 \text{ /sec} \\
 k_{2 \rightarrow 3} &= 316.91 \pm 42.70 \text{ /sec} \\
 k_{3 \rightarrow 1} &= 1757.48 \pm 116.55 \text{ /sec} \\
 k_{3 \rightarrow 2} &= 203.29 \pm 31.95 \text{ /sec}
 \end{aligned}$$

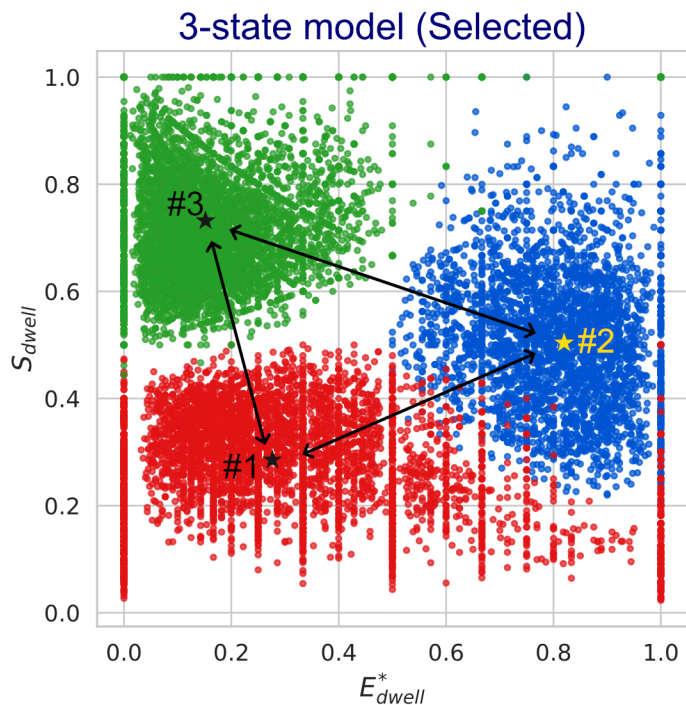

$$\begin{aligned}
 k_{1 \rightarrow 2} &= 3251.83 \text{ /s} \\
 k_{1 \rightarrow 3} &= 5627.78 \text{ /s} \\
 k_{1 \rightarrow 4} &= 3924.84 \text{ /s} \\
 k_{1 \rightarrow 5} &= 219.12 \text{ /s} \\
 k_{2 \rightarrow 1} &= 1154.92 \text{ /s} \\
 k_{2 \rightarrow 3} &= 435.56 \text{ /s} \\
 k_{2 \rightarrow 4} &= 5.5 \times 10^{-116} \text{ /s} \\
 k_{2 \rightarrow 5} &= 81.22 \text{ /s} \\
 k_{3 \rightarrow 1} &= 270.31 \text{ /s} \\
 k_{3 \rightarrow 2} &= 1155.93 \text{ /s} \\
 k_{3 \rightarrow 4} &= 1148.92 \text{ /s} \\
 k_{3 \rightarrow 5} &= 2.2 \times 10^{-60} \text{ /s} \\
 k_{4 \rightarrow 1} &= 357.30 \text{ /s} \\
 k_{4 \rightarrow 2} &= 1.9 \times 10^{-31} \text{ /s} \\
 k_{4 \rightarrow 3} &= 216.20 \text{ /s} \\
 k_{4 \rightarrow 5} &= 1248.79 \text{ /s} \\
 k_{5 \rightarrow 1} &= 140.78 \text{ /s} \\
 k_{5 \rightarrow 2} &= 26.80 \text{ /s} \\
 k_{5 \rightarrow 3} &= 7.3 \times 10^{-101} \text{ /s} \\
 k_{5 \rightarrow 4} &= 1651.07 \text{ /s}
 \end{aligned}$$

### 5-state model (ICL minimized)

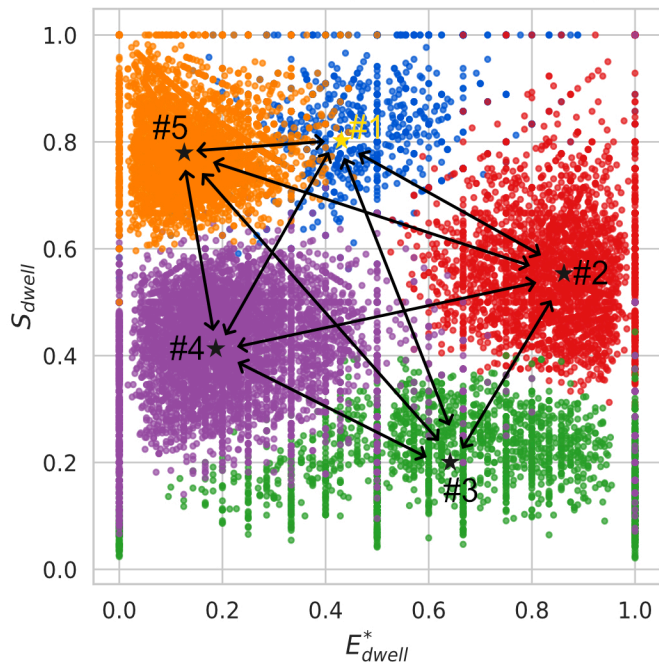

# +Ssa1<sup>ATP</sup>

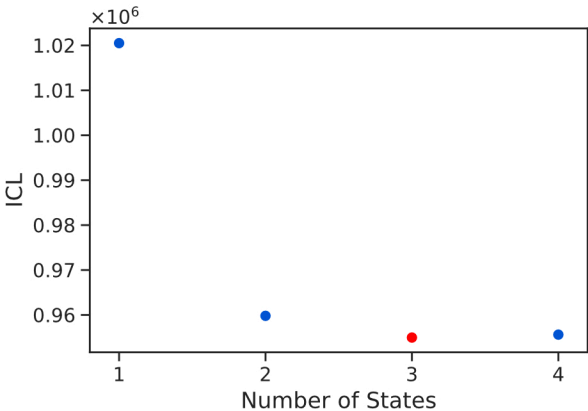

|                       |   |                      |      |
|-----------------------|---|----------------------|------|
| $k_{1 \rightarrow 2}$ | = | $305.40 \pm 25.55$   | /sec |
| $k_{1 \rightarrow 3}$ | = | $1623.00 \pm 131.88$ | /sec |
| $k_{2 \rightarrow 1}$ | = | $388.94 \pm 42.54$   | /sec |
| $k_{2 \rightarrow 3}$ | = | $316.99 \pm 19.82$   | /sec |
| $k_{3 \rightarrow 1}$ | = | $1530.15 \pm 124.47$ | /sec |
| $k_{3 \rightarrow 2}$ | = | $301.80 \pm 16.91$   | /sec |

## 3-state model (Selected, ICL minimized)

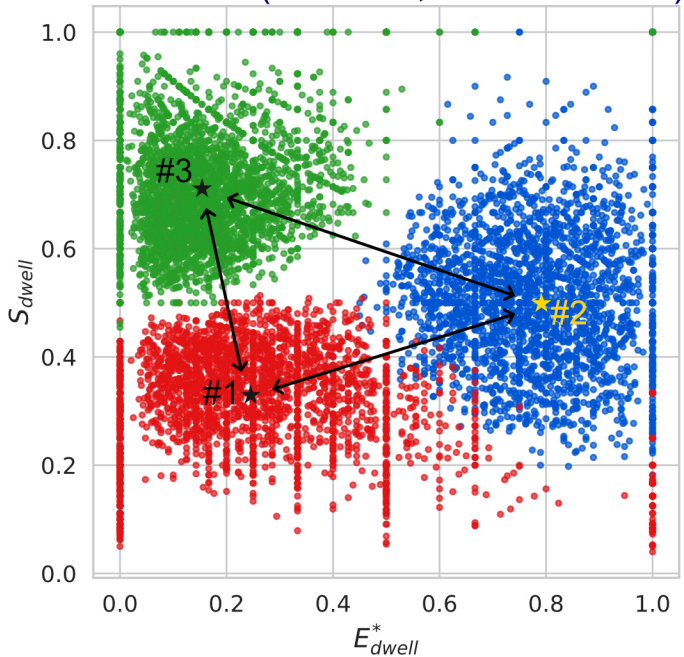

+Ssa1<sup>ADP</sup>

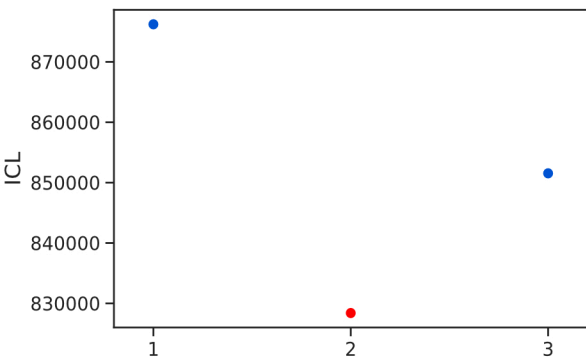

Number of States

$$\begin{aligned}k_{1 \rightarrow 2} &= 76.19 \pm 18.10 \text{ /sec} \\k_{1 \rightarrow 3} &= 2081.69 \pm 72.48 \text{ /sec} \\k_{2 \rightarrow 1} &= 210.18 \pm 74.50 \text{ /sec} \\k_{2 \rightarrow 3} &= 196.68 \pm 50.63 \text{ /sec} \\k_{3 \rightarrow 1} &= 2275.59 \pm 143.92 \text{ /sec} \\k_{3 \rightarrow 2} &= 84.69 \pm 18.85 \text{ /sec}\end{aligned}$$

3-state model (Selected model)

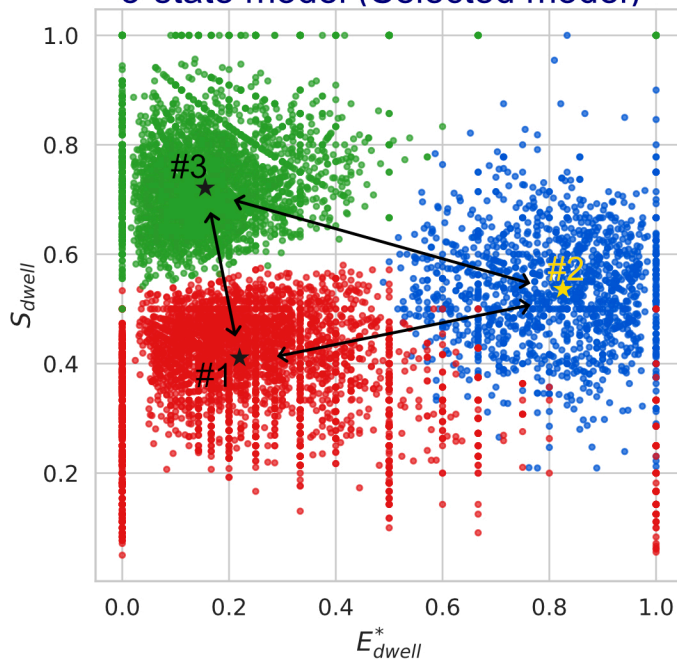

2-state model (ICL minimized)

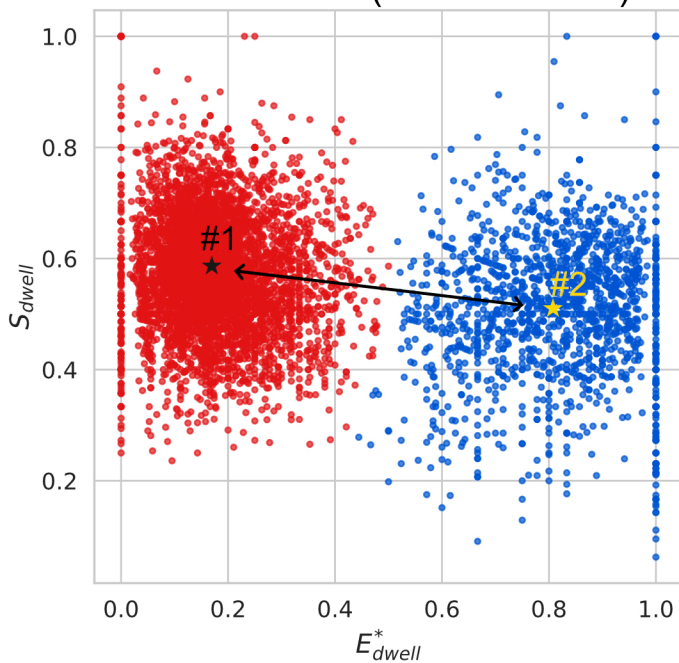

$$\begin{aligned}k_{1 \rightarrow 2} &= 115.57 \text{ /sec} \\k_{2 \rightarrow 1} &= 449.99 \text{ /sec}\end{aligned}$$



# +Ssa1<sup>ATP</sup>+Ydj1

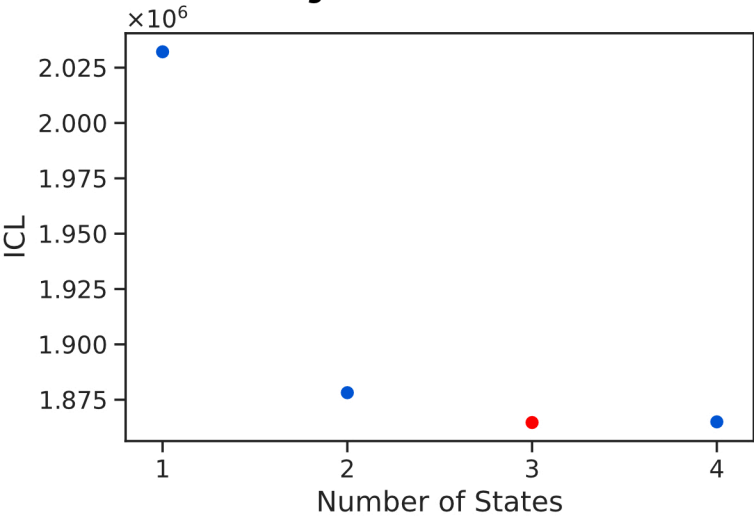

$$\begin{aligned}k_{1 \rightarrow 2} &= 90.99 \pm 4.87 \text{ /sec} \\k_{1 \rightarrow 3} &= 1014.30 \pm 96.50 \text{ /sec} \\k_{2 \rightarrow 1} &= 192.44 \pm 27.43 \text{ /sec} \\k_{2 \rightarrow 3} &= 192.94 \pm 22.33 \text{ /sec} \\k_{3 \rightarrow 1} &= 1348.50 \pm 92.54 \text{ /sec} \\k_{3 \rightarrow 2} &= 107.33 \pm 18.38 \text{ /sec}\end{aligned}$$

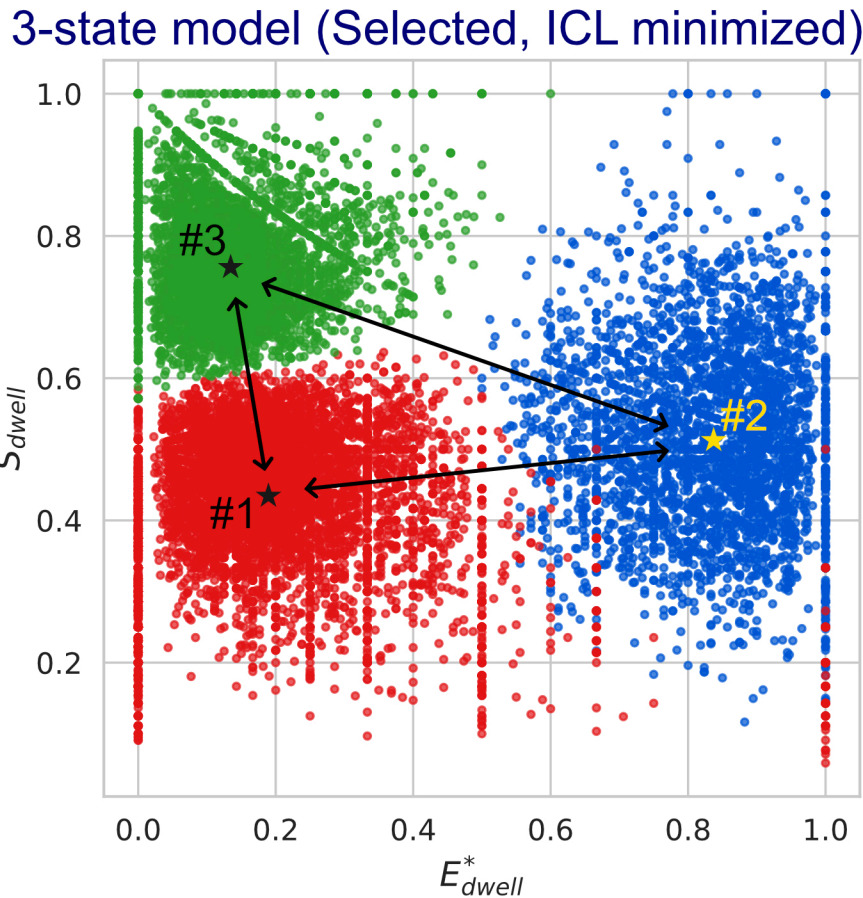

# +Ssa1<sup>ATP</sup>+Bos1

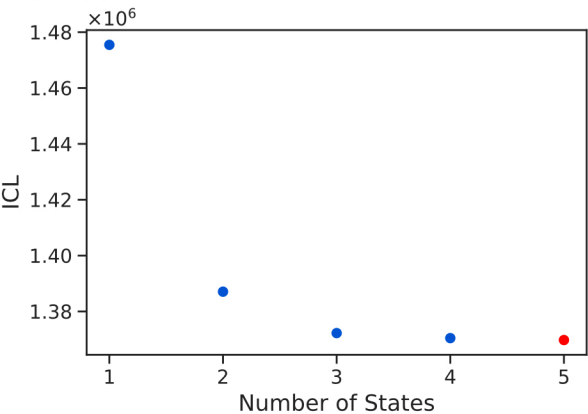

$$\begin{aligned}k_{1 \rightarrow 2} &= 275.16 \pm 30.91 \text{ /sec} \\k_{1 \rightarrow 3} &= 1861.48 \pm 126.17 \text{ /sec} \\k_{2 \rightarrow 1} &= 344.73 \pm 67.03 \text{ /sec} \\k_{2 \rightarrow 3} &= 371.39 \pm 45.78 \text{ /sec} \\k_{3 \rightarrow 1} &= 1584.17 \pm 181.18 \text{ /sec} \\k_{3 \rightarrow 2} &= 271.58 \pm 35.26 \text{ /sec}\end{aligned}$$

$$\begin{aligned}k_{1 \rightarrow 2} &= 969.24 \text{ /s} \\k_{1 \rightarrow 3} &= 2410.04 \text{ /s} \\k_{1 \rightarrow 4} &= 577.38 \text{ /s} \\k_{1 \rightarrow 5} &= 424.66 \text{ /s} \\k_{2 \rightarrow 1} &= 990.33 \text{ /s} \\k_{2 \rightarrow 3} &= 565.80 \text{ /s} \\k_{2 \rightarrow 4} &= 5.8 \times 10^{-30} \text{ /s} \\k_{2 \rightarrow 5} &= 57.51 \text{ /s} \\k_{3 \rightarrow 1} &= 1349.79 \text{ /s} \\k_{3 \rightarrow 2} &= 907.29 \text{ /s}\end{aligned}$$

$$\begin{aligned}k_{3 \rightarrow 4} &= 539.78 \text{ /s} \\k_{3 \rightarrow 5} &= 5.4 \times 10^{-6} \text{ /s} \\k_{4 \rightarrow 1} &= 115.20 \text{ /s} \\k_{4 \rightarrow 2} &= 1.5 \times 10^{-12} \text{ /s} \\k_{4 \rightarrow 3} &= 180.85 \text{ /s} \\k_{4 \rightarrow 5} &= 1256.43 \text{ /s} \\k_{5 \rightarrow 1} &= 188.84 \text{ /s} \\k_{5 \rightarrow 2} &= 12.33 \text{ /s} \\k_{5 \rightarrow 3} &= 4.5 \times 10^{-31} \text{ /s} \\k_{5 \rightarrow 4} &= 1390.37 \text{ /s}\end{aligned}$$

## 3-state model (Selected)

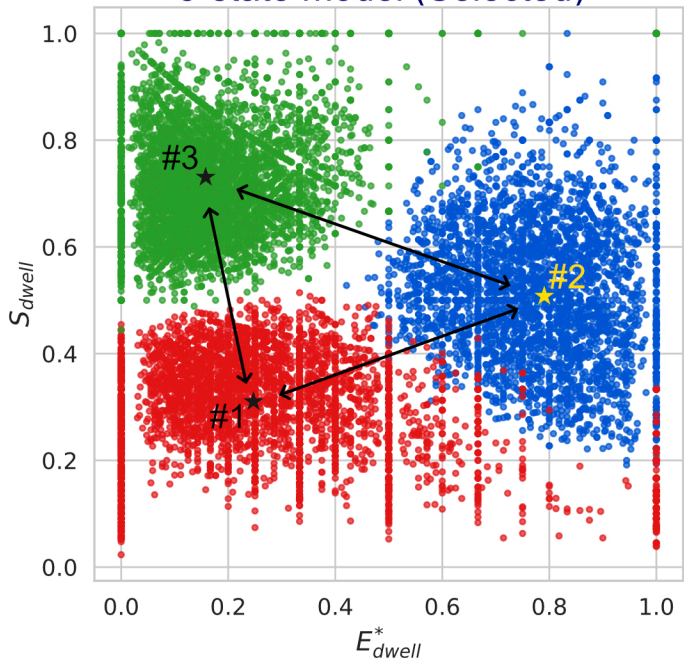

## 5-state model (ICL minimized)

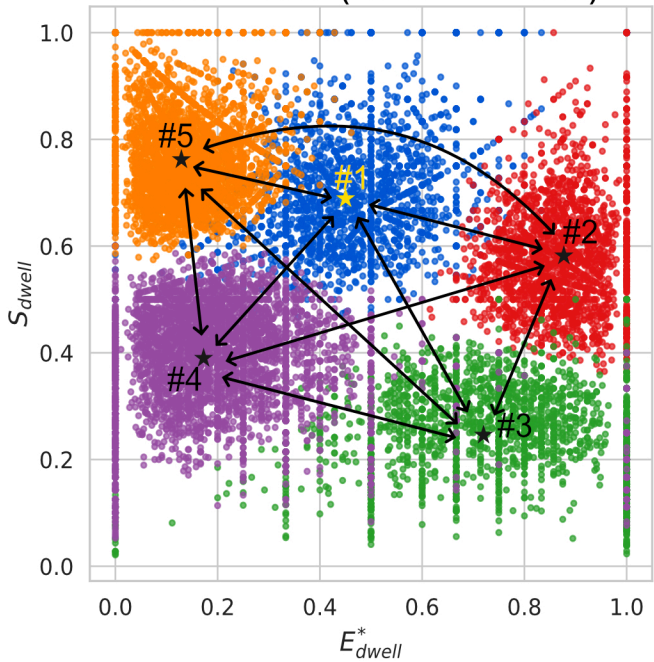

# +Ssa1<sup>ATP</sup>+Ydj1+Bos1

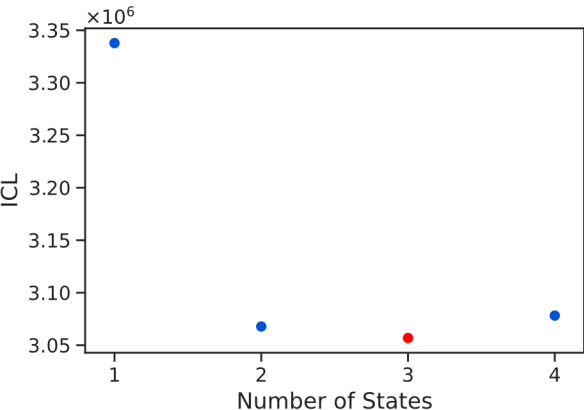

$$\begin{aligned}k_{1 \rightarrow 2} &= 255.33 \pm 46.09 \text{ /sec} \\k_{1 \rightarrow 3} &= 1901.13 \pm 244.30 \text{ /sec} \\k_{2 \rightarrow 1} &= 272.50 \pm 27.77 \text{ /sec} \\k_{2 \rightarrow 3} &= 237.35 \pm 29.97 \text{ /sec} \\k_{3 \rightarrow 1} &= 2022.68 \pm 186.19 \text{ /sec} \\k_{3 \rightarrow 2} &= 288.99 \pm 36.50 \text{ /sec}\end{aligned}$$

## 3-state model (Selected, ICL minimized)

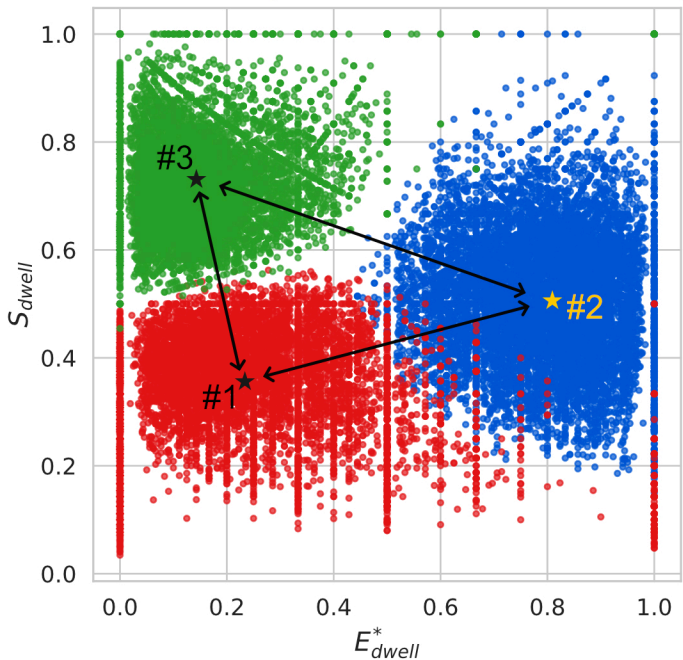

# +Ssa1<sup>ATP</sup>+JD-GF+Bos1

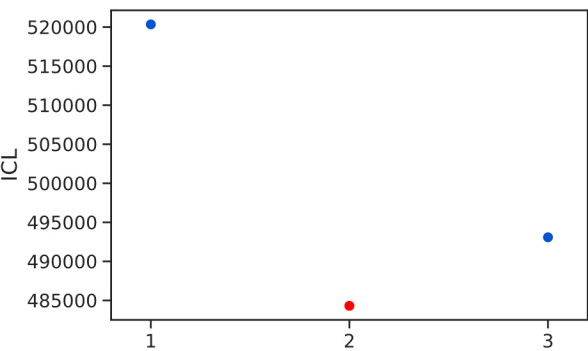

| Number of States      |                          |
|-----------------------|--------------------------|
| $k_{1 \rightarrow 2}$ | $319.85 \pm 69.36$ /sec  |
| $k_{1 \rightarrow 3}$ | $3469.68 \pm 53.23$ /sec |
| $k_{2 \rightarrow 1}$ | $325.25 \pm 40.21$ /sec  |
| $k_{2 \rightarrow 3}$ | $205.68 \pm 59.46$ /sec  |
| $k_{3 \rightarrow 1}$ | $3338.04 \pm 94.73$ /sec |
| $k_{3 \rightarrow 2}$ | $281.57 \pm 101.73$ /sec |

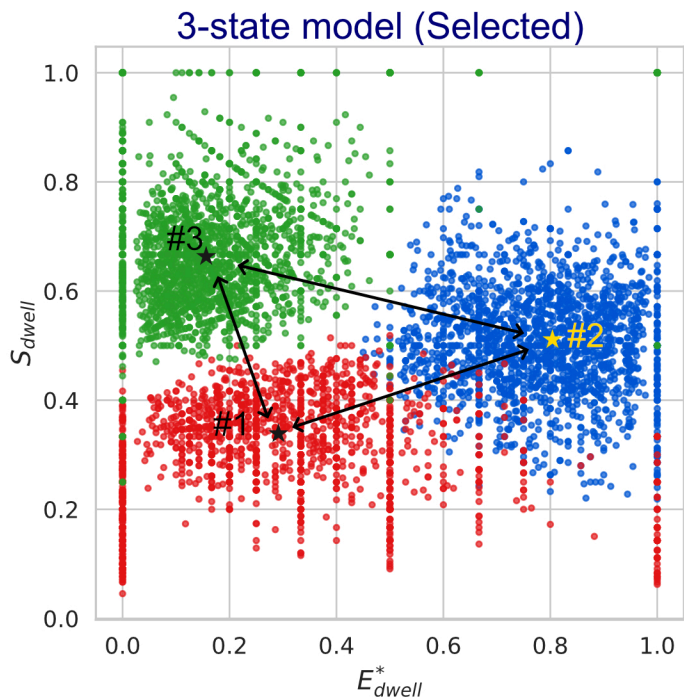

|                       |               |
|-----------------------|---------------|
| $k_{1 \rightarrow 2}$ | $387.55$ /sec |
| $k_{2 \rightarrow 1}$ | $465.47$ /sec |

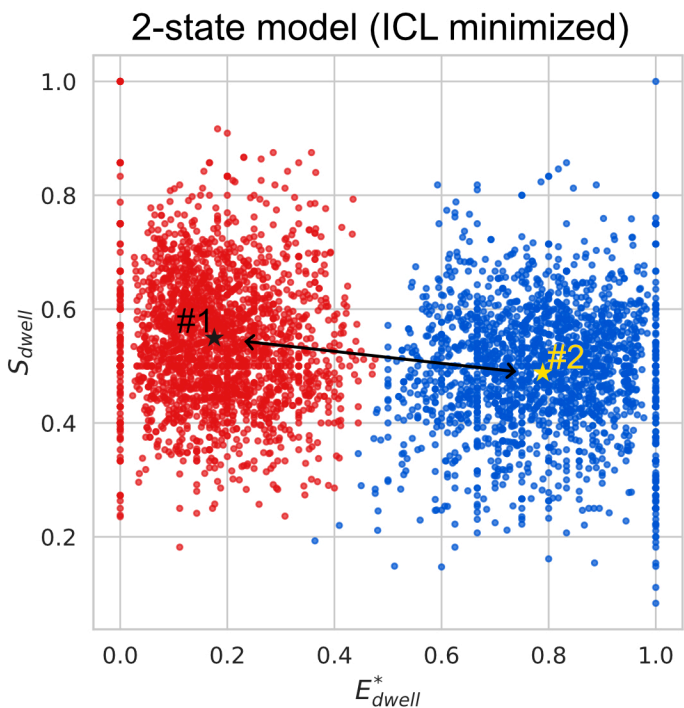



# +Ssa1<sup>ATP</sup>+Ydj1+4AG

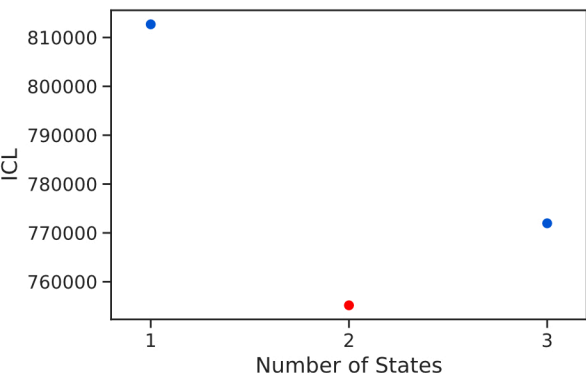

$$\begin{aligned}k_{1 \rightarrow 2} &= 140.38 \pm 6.71 \text{ /sec} \\k_{1 \rightarrow 3} &= 2409.99 \pm 162.30 \text{ /sec} \\k_{2 \rightarrow 1} &= 194.37 \pm 16.05 \text{ /sec} \\k_{2 \rightarrow 3} &= 226.41 \pm 26.49 \text{ /sec} \\k_{3 \rightarrow 1} &= 2589.97 \pm 27.24 \text{ /sec} \\k_{3 \rightarrow 2} &= 194.24 \pm 27.44 \text{ /sec}\end{aligned}$$

$$\begin{aligned}k_{1 \rightarrow 2} &= 205.82 \text{ /sec} \\k_{2 \rightarrow 1} &= 419.98 \text{ /sec}\end{aligned}$$

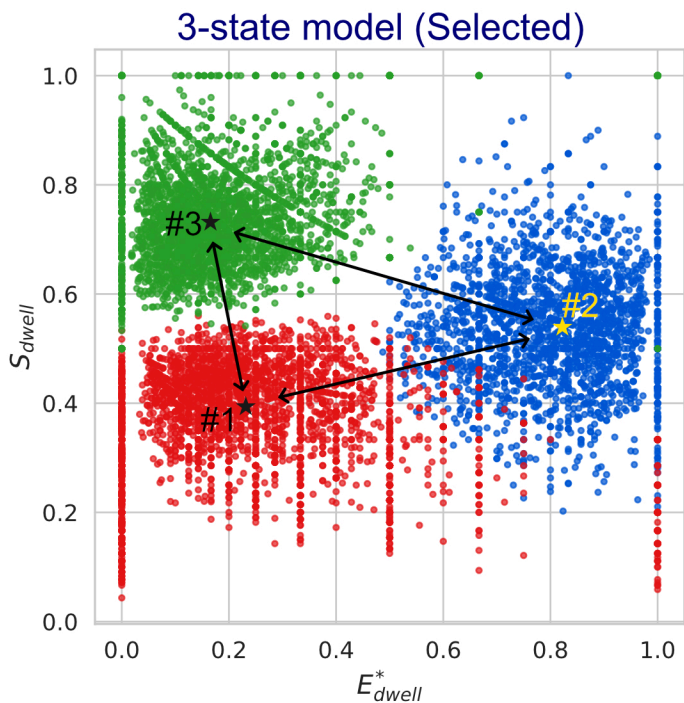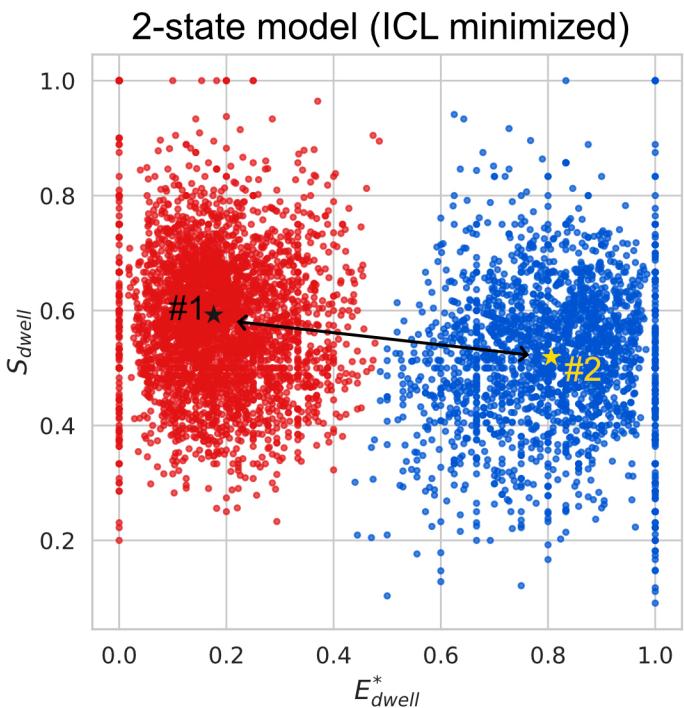



# +Ssa1<sup>ATP</sup>+Ydj1+6AG

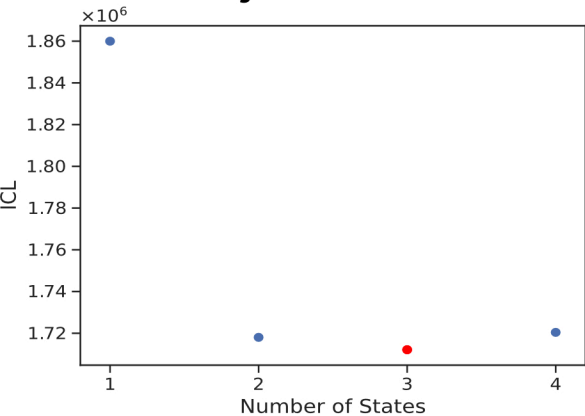

$$\begin{aligned}k_{1 \rightarrow 2} &= 102.87 \pm 9.54 \text{ /sec} \\k_{1 \rightarrow 3} &= 1639.97 \pm 91.49 \text{ /sec} \\k_{2 \rightarrow 1} &= 207.16 \pm 12.09 \text{ /sec} \\k_{2 \rightarrow 3} &= 150.34 \pm 20.06 \text{ /sec} \\k_{3 \rightarrow 1} &= 1515.11 \pm 81.58 \text{ /sec} \\k_{3 \rightarrow 2} &= 76.45 \pm 12.88 \text{ /sec}\end{aligned}$$

## 3-state model (Selected, ICL minimized)

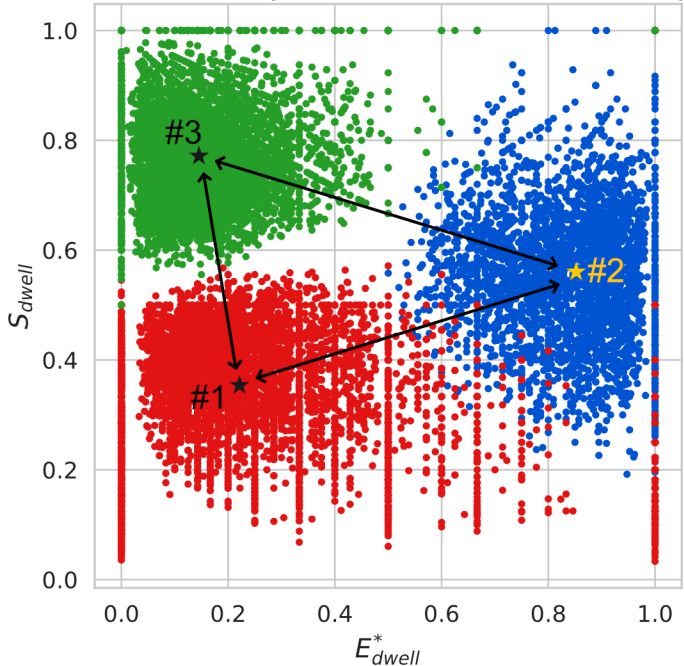

# +Ssa1<sup>ATP</sup>+Ydj1+Bos1+Get3

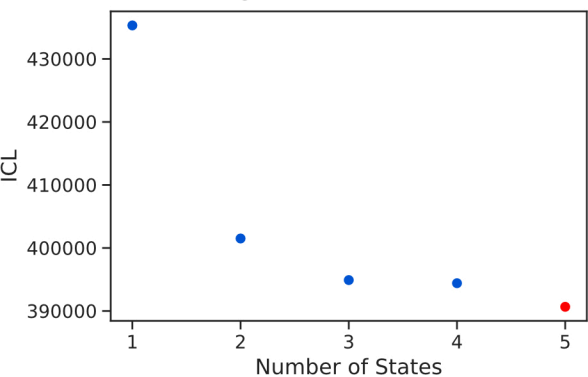

$$\begin{aligned}
 k_{1 \rightarrow 2} &= 329.69 \text{ /sec} \\
 k_{1 \rightarrow 3} &= 1385.10 \text{ /sec} \\
 k_{2 \rightarrow 1} &= 372.03 \text{ /sec} \\
 k_{2 \rightarrow 3} &= 270.78 \text{ /sec} \\
 k_{3 \rightarrow 1} &= 1275.68 \text{ /sec} \\
 k_{3 \rightarrow 2} &= 323.97 \text{ /sec}
 \end{aligned}$$

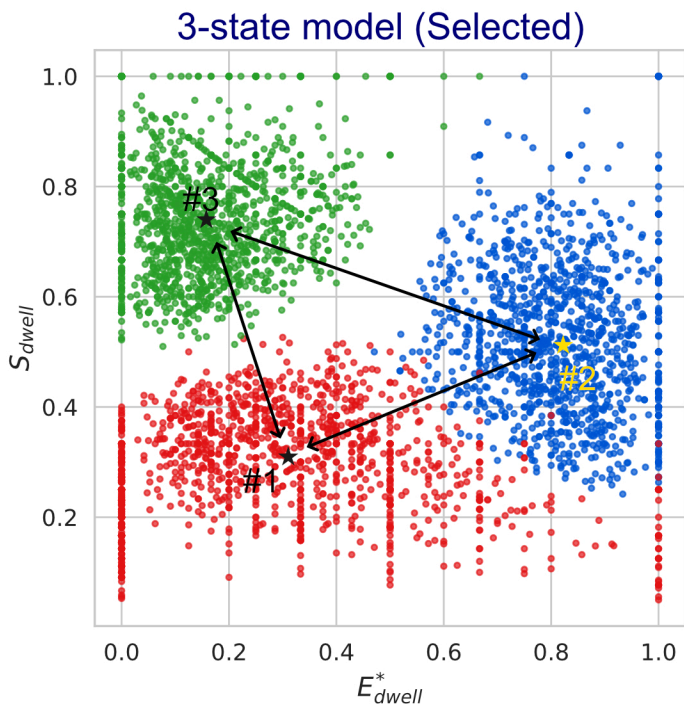

$$\begin{aligned}
 k_{1 \rightarrow 2} &= 4967.57 \text{ /s} & k_{3 \rightarrow 4} &= 654.25 \text{ /s} \\
 k_{1 \rightarrow 3} &= 32033.94 \text{ /s} & k_{3 \rightarrow 5} &= 1.2 \times 10^{-21} \text{ /s} \\
 k_{1 \rightarrow 4} &= 26170.07 \text{ /s} & k_{4 \rightarrow 1} &= 3.9 \times 10^{-7} \text{ /s} \\
 k_{1 \rightarrow 5} &= 1.7 \times 10^{-39} \text{ /s} & k_{4 \rightarrow 2} &= 3.1 \times 10^{-22} \text{ /s} \\
 k_{2 \rightarrow 1} &= 8.60 \text{ /s} & k_{4 \rightarrow 3} &= 338.94 \text{ /s} \\
 k_{2 \rightarrow 3} &= 826.97 \text{ /s} & k_{4 \rightarrow 5} &= 1215.76 \text{ /s} \\
 k_{2 \rightarrow 4} &= 4.0 \times 10^{-25} \text{ /s} & k_{5 \rightarrow 1} &= 1.7 \times 10^{-14} \text{ /s} \\
 k_{2 \rightarrow 5} &= 422.83 \text{ /s} & k_{5 \rightarrow 2} &= 342.08 \text{ /s} \\
 k_{3 \rightarrow 1} &= 3.8 \times 10^{-12} \text{ /s} & k_{5 \rightarrow 3} &= 1.9 \times 10^{-62} \text{ /s} \\
 k_{3 \rightarrow 2} &= 1314.83 \text{ /s} & k_{5 \rightarrow 4} &= 1058.69 \text{ /s}
 \end{aligned}$$

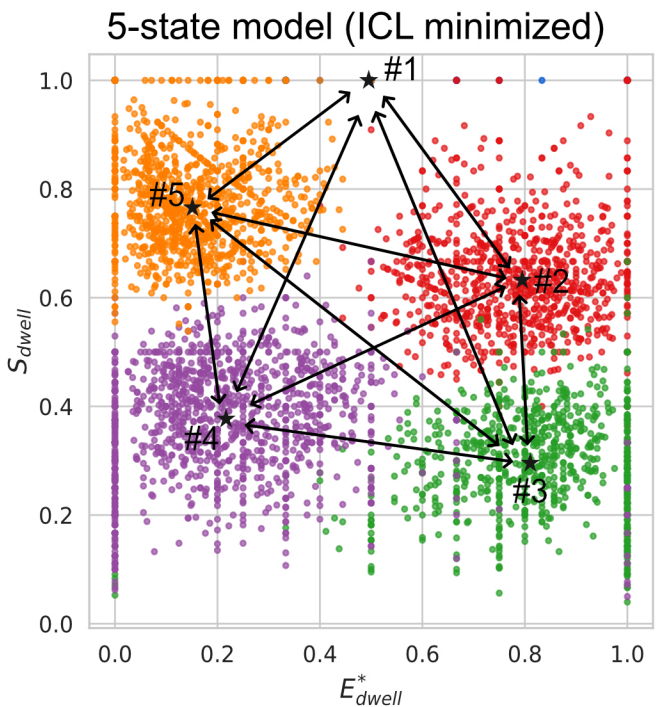

# +Ssa1<sup>ATP</sup>+Ydj1+Bos1+Get4/5

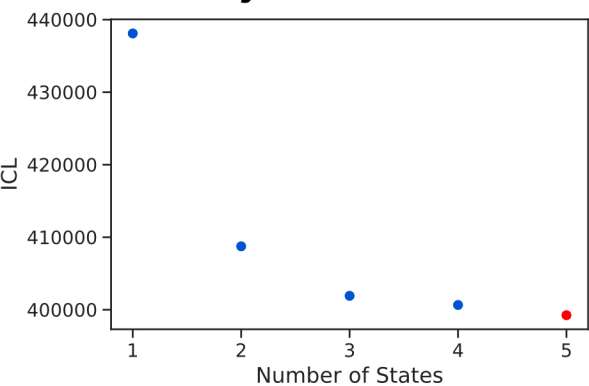

$$\begin{aligned}
 k_{1 \rightarrow 2} &= 414.31 \text{ /sec} \\
 k_{1 \rightarrow 3} &= 1415.79 \text{ /sec} \\
 k_{2 \rightarrow 1} &= 406.91 \text{ /sec} \\
 k_{2 \rightarrow 3} &= 376.64 \text{ /sec} \\
 k_{3 \rightarrow 1} &= 1414.17 \text{ /sec} \\
 k_{3 \rightarrow 2} &= 430.64 \text{ /sec}
 \end{aligned}$$

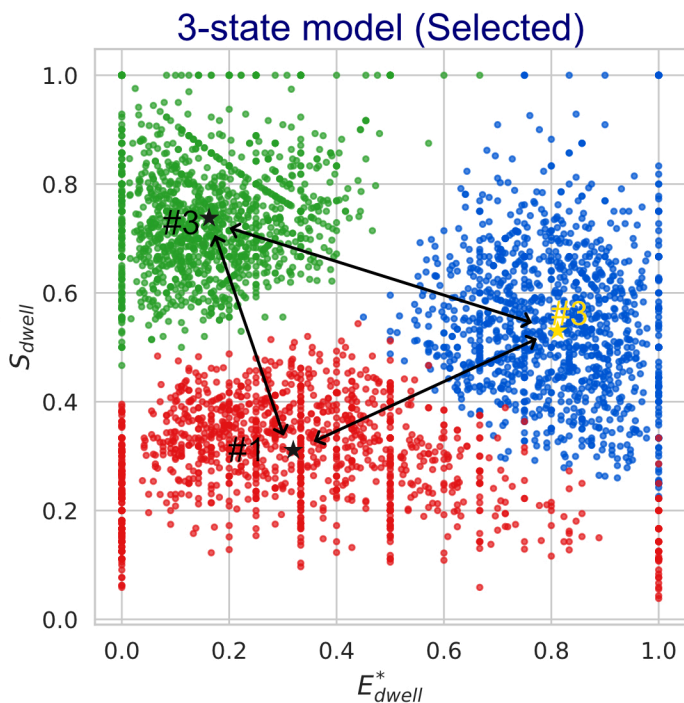

$$\begin{aligned}
 k_{1 \rightarrow 2} &= 1008.41 \text{ /s} \\
 k_{1 \rightarrow 3} &= 792.20 \text{ /s} \\
 k_{1 \rightarrow 4} &= 212.12 \text{ /s} \\
 k_{1 \rightarrow 5} &= 407.77 \text{ /s} \\
 k_{2 \rightarrow 1} &= 778.22 \text{ /s} \\
 k_{2 \rightarrow 3} &= 927.03 \text{ /s} \\
 k_{2 \rightarrow 4} &= 6.0 \times 10^{-16} \text{ /s} \\
 k_{2 \rightarrow 5} &= 60.23 \text{ /s} \\
 k_{3 \rightarrow 1} &= 630.87 \text{ /s} \\
 k_{3 \rightarrow 2} &= 857.43 \text{ /s} \\
 k_{3 \rightarrow 4} &= 350.91 \text{ /s} \\
 k_{3 \rightarrow 5} &= 5.3 \times 10^{-7} \text{ /s} \\
 k_{4 \rightarrow 1} &= 138.76 \text{ /s} \\
 k_{4 \rightarrow 2} &= 3.7 \times 10^{-20} \text{ /s} \\
 k_{4 \rightarrow 3} &= 243.42 \text{ /s} \\
 k_{4 \rightarrow 5} &= 1005.13 \text{ /s} \\
 k_{5 \rightarrow 1} &= 314.87 \text{ /s} \\
 k_{5 \rightarrow 2} &= 8.37 \text{ /s} \\
 k_{5 \rightarrow 3} &= 2.3 \times 10^{-7} \text{ /s} \\
 k_{5 \rightarrow 4} &= 1368.14 \text{ /s}
 \end{aligned}$$

### 5-state model (ICL minimized)

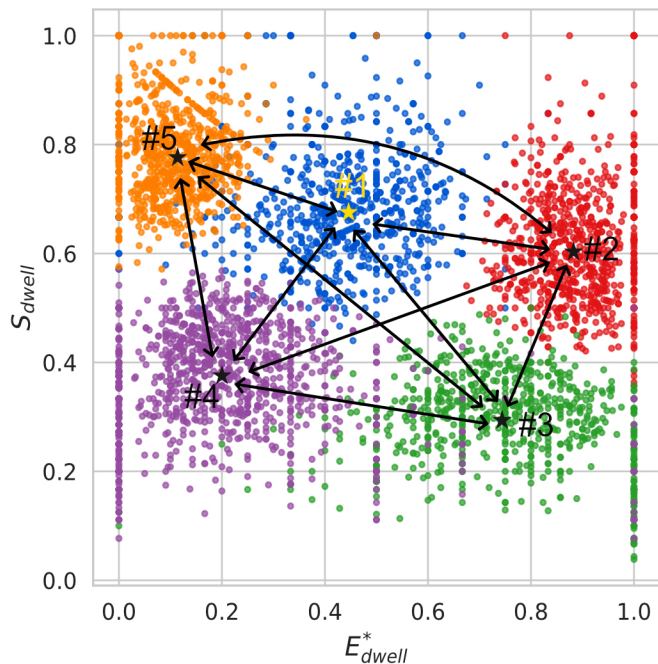

# +Ssa1<sup>ATP</sup>+Ydj1+Bos1+Get3/4/5

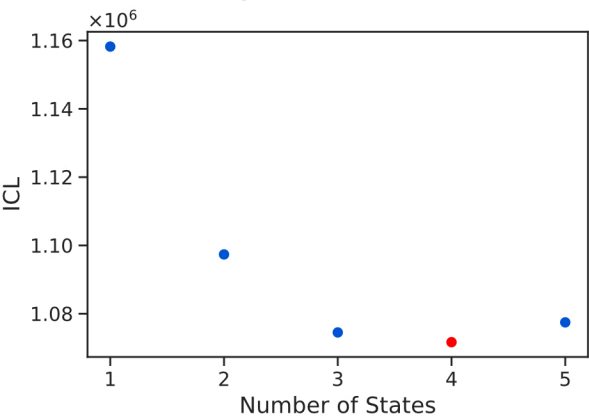

$$\begin{aligned}
 k_{1 \rightarrow 2} &= 174.84 \pm 54.53 \text{ /sec} \\
 k_{1 \rightarrow 3} &= 1378.01 \pm 86.53 \text{ /sec} \\
 k_{2 \rightarrow 1} &= 332.78 \pm 61.04 \text{ /sec} \\
 k_{2 \rightarrow 3} &= 429.61 \pm 64.51 \text{ /sec} \\
 k_{3 \rightarrow 1} &= 1230.07 \pm 77.10 \text{ /sec} \\
 k_{3 \rightarrow 2} &= 236.26 \pm 28.20 \text{ /sec}
 \end{aligned}$$

## 3-state model (Selected)

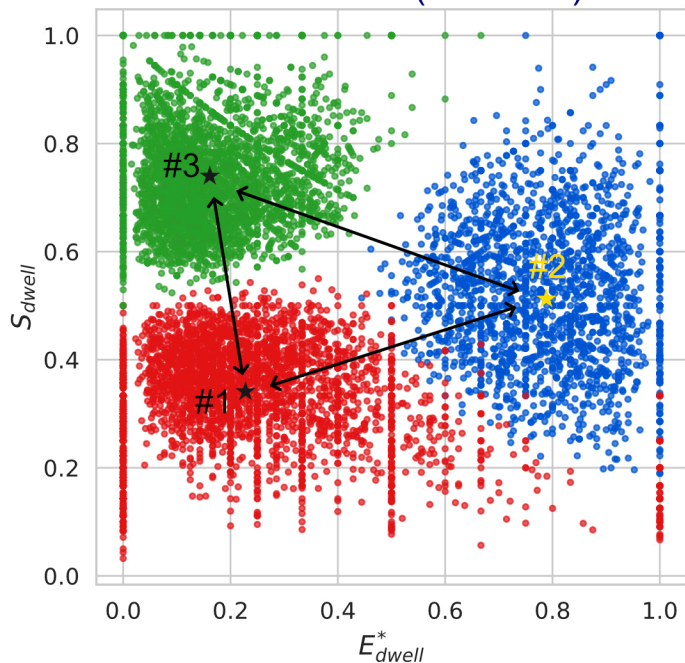

## 4-state model (ICL minimized)

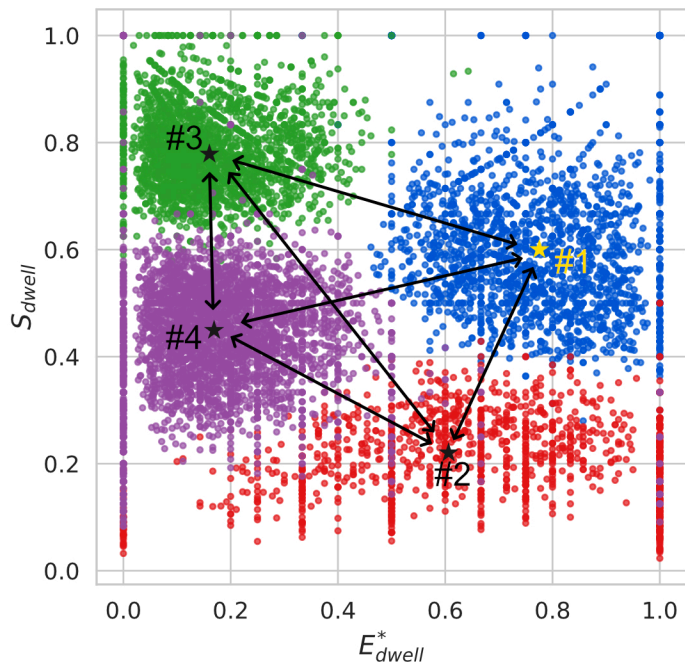

$$\begin{aligned}
 k_{1 \rightarrow 2} &= 1222.47 \text{ /sec} \\
 k_{1 \rightarrow 3} &= 525.20 \text{ /sec} \\
 k_{1 \rightarrow 4} &= 3.3 \times 10^{-4} \text{ /sec} \\
 k_{2 \rightarrow 1} &= 1478.95 \text{ /sec} \\
 k_{2 \rightarrow 3} &= 1.9 \times 10^{-64} \text{ /sec} \\
 k_{2 \rightarrow 4} &= 1369.28 \text{ /sec} \\
 k_{3 \rightarrow 1} &= 298.80 \text{ /sec} \\
 k_{3 \rightarrow 2} &= 2.7 \times 10^{-60} \text{ /sec} \\
 k_{3 \rightarrow 4} &= 1185.57 \text{ /sec} \\
 k_{4 \rightarrow 1} &= 4.9 \times 10^{-60} \text{ /sec} \\
 k_{4 \rightarrow 2} &= 487.60 \text{ /sec} \\
 k_{4 \rightarrow 3} &= 960.19 \text{ /sec}
 \end{aligned}$$
